# Supplementary material for: Hydrogen bond effect on the photophysical properties of 2-ureido-4[1H]-pyrimidinone quadruple hydrogen bonded systems
Source: Royal Society of Chemistry journal article supplement (doi:10.1039/c5ra04005a), 2015-01-01
Supplement: c5ra04005a1.pdf [file c5ra04005a1.pdf]

# Hydrogen Bond Effect on the Photophysical Properties of 2-Ureido-4[1*H*]-pyrimidinone Quadruple Hydrogen Bonded Systems

Jun-Sheng Chen,<sup>1,3,4</sup> Feng-Jiao Zhao,<sup>1,4</sup> Yang Yang,<sup>1</sup> Tian-Shu Chu\*<sup>1,2</sup>

<sup>1</sup>*State Key Laboratory of Molecular Reaction Dynamics, Dalian Institute of Chemical Physics, Chinese Academy of Sciences, Dalian, 116023, People's Republic of China*

<sup>2</sup>*Institute for Computational Sciences and Engineering, Laboratory of New Fiber Materials and Modern Textile, the Growing Base for State Key Laboratory, Qingdao University, Qingdao, 266071, People's Republic of China*

<sup>3</sup>*Department of Chemical Physics, Lund University, 22100 Lund, Sweden*

<sup>4</sup>*University of the Chinese Academy of Sciences, Beijing, 100049, People's Republic of China*

---

\* Corresponding author, Emails: [tschu@dicp.ac.cn](mailto:tschu@dicp.ac.cn); [tschu008@163.com](mailto:tschu008@163.com)

**Table S1.** Summary of steady-state absorption and fluorescence emission measurements.

| compound         | absorption bands $\lambda_{\max}$ / nm [ $\epsilon \times 10^4 / \text{cm}^{-1} \cdot \text{M}^{-1}$ ] | $\lambda_{\text{ex}}$ /nm | $\lambda_{\text{emis}}$ /nm |
|------------------|--------------------------------------------------------------------------------------------------------|---------------------------|-----------------------------|
| <b>AnUP-DCM</b>  | 391 [4.59], 370 [4.74], 352 [2.91], 335 [1.34],<br>259 [62.06]                                         | 350                       | 392, 415,<br>441, 470       |
| <b>AnUP-DMSO</b> | 393 [9.11], 372 [9.63], 354 [6.02], 337 [3.05],<br>287 [12.29], 261 [116.45]                           | 350                       | 395, 418,<br>443,469        |
| <b>NaUP-DCM</b>  | 268 [13.88]                                                                                            | 280                       | 319, 326,<br>350, 334       |
| <b>NaUP-DMSO</b> | 288 [24.93]                                                                                            | 280                       | 319, 335,<br>350            |
| <b>UPNa-DCM</b>  | 288 [1.35], 256 [4.08]                                                                                 | 280                       | 340, 353                    |
| <b>UPNa-DMSO</b> | 285 [0.68]                                                                                             | 280                       | 358                         |

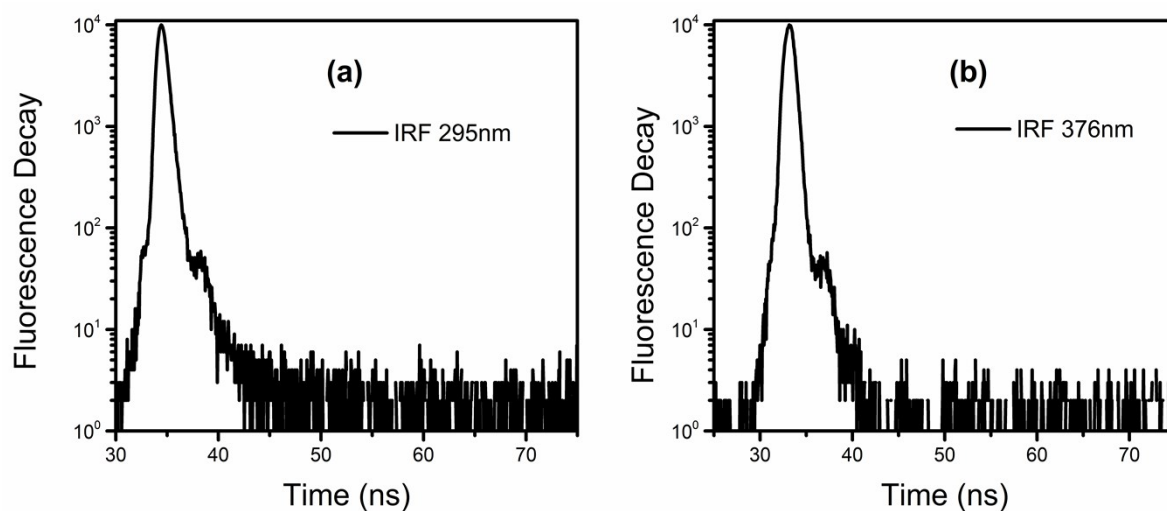

**Figure S1.** The instrument response functions (IRFs)

**Table S2:** Calculated important bond lengths (in Å) and bond angles (in degree) for the fully optimized structure of AnUP-dimer (in DCM) and AnUP-DMSO complex (in DMSO) in ground state ( $S_0$ ) and first excited state ( $S_1$ ). The corresponding X-ray data<sup>1</sup> are listed in parentheses.

|                                                                                     | AnUP(DCM) <sup>[a]</sup> | AnUP(DMSO) <sup>[a]</sup> | AnUP(DCM) <sup>[b]</sup> | AnUP(DMSO) <sup>[b]</sup> |
|-------------------------------------------------------------------------------------|--------------------------|---------------------------|--------------------------|---------------------------|
| N <sub>1</sub> -H <sub>1</sub>                                                      | 1.03 (0.86)              | 1.02                      | 1.04                     | 1.03                      |
| N <sub>2</sub> -H <sub>2</sub>                                                      | 1.04 (0.86)              | 1.04                      | 1.04                     | 1.04                      |
| N <sub>1</sub> '-H <sub>1</sub> '                                                   | 1.03 (0.86)              | -                         | 1.04                     | -                         |
| N <sub>2</sub> '-H <sub>2</sub> '                                                   | 1.04 (0.86)              | -                         | 1.04                     | -                         |
| N <sub>4</sub> -H <sub>3</sub>                                                      | 1.03 (0.86)              | 1.03                      | 1.03                     | 1.03                      |
| N <sub>4</sub> '-H <sub>3</sub> '                                                   | 1.03 (0.86)              | -                         | 1.03                     | -                         |
| O <sub>1</sub> '...H <sub>1</sub>                                                   | 1.71 (1.90)              | 1.99                      | 1.71                     | 1.99                      |
| N <sub>3</sub> '...H <sub>2</sub>                                                   | 1.92 (2.12)              | -                         | 1.92                     | -                         |
| N <sub>3</sub> '...H <sub>2</sub> '                                                 | 1.92 (2.12)              | -                         | 1.92                     | -                         |
| O <sub>1</sub> '...H <sub>1</sub> '/H <sub>2</sub>                                  | 1.71 (1.90)              | 1.68                      | 1.72                     | 1.68                      |
| O <sub>2</sub> '...H <sub>3</sub>                                                   | 1.72 (1.91)              | 1.83                      | 1.72                     | 1.83                      |
| O <sub>2</sub> '...H <sub>3</sub> '                                                 | 1.72 (1.90)              | -                         | 1.72                     | -                         |
| O <sub>1</sub> '...H <sub>1</sub> -N <sub>1</sub>                                   | 173.19 (168.75)          | 141.08                    | 173.25                   | 141.06                    |
| N <sub>3</sub> '...H <sub>2</sub> -N <sub>2</sub>                                   | 179.70 (171.39)          | -                         | 179.79                   | -                         |
| N <sub>3</sub> '...H <sub>2</sub> '-N <sub>2</sub> '                                | 179.71 (171.99)          | -                         | 179.62                   | -                         |
| O <sub>1</sub> '...H <sub>1</sub> '/H <sub>2</sub> -N <sub>1</sub> '/N <sub>2</sub> | 173.19 (161.56)          | 170.67                    | 173.22                   | 170.68                    |
| O <sub>2</sub> '...H <sub>3</sub> -N <sub>4</sub>                                   | 136.60 (133.01)          | 132.68                    | 136.63                   | 132.77                    |
| O <sub>2</sub> '...H <sub>3</sub> '-N <sub>4</sub> '                                | 136.60 (133.68)          | -                         | 136.58                   | -                         |
| C <sub>1</sub> -N <sub>1</sub> -C <sub>2</sub> -N <sub>2</sub>                      | -179.77 (-176.79)        | -179.71                   | -179.87                  | -179.69                   |
| O <sub>2</sub> -C <sub>2</sub> -N <sub>2</sub> -C <sub>3</sub>                      | 0.09 (-8.06)             | -9.78                     | 0.72                     | -9.93                     |
| H <sub>3</sub> -N <sub>4</sub> -C <sub>4</sub> -C <sub>6</sub>                      | -179.38 (177.42)         | 179.71                    | -179.65                  | 179.82                    |
| C <sub>5</sub> -C <sub>6</sub> -C <sub>7</sub> -C <sub>8</sub>                      | 126.57 (130.37)          | -57.78                    | 125.96                   | -58.08                    |
| C <sub>5</sub> -C <sub>6</sub> -C <sub>8</sub> -C <sub>9</sub>                      | -161.30 (-158.78)        | -97.56                    | -160.44                  | -97.00                    |
| C <sub>1</sub> '-N <sub>1</sub> '-C <sub>2</sub> '-N <sub>2</sub> '                 | 179.77 (-178.33)         | -                         | 179.78                   | -                         |
| O <sub>2</sub> '-C <sub>2</sub> '-N <sub>2</sub> '-C <sub>3</sub> '                 | -0.09 (-0.85)            | -                         | 0.14                     | -                         |
| H <sub>3</sub> '-N <sub>4</sub> '-C <sub>4</sub> '-C <sub>6</sub> '                 | 179.39 (-179.25)         | -                         | 179.57                   | -                         |
| C <sub>5</sub> '-C <sub>6</sub> '-C <sub>7</sub> '-C <sub>8</sub> '                 | -126.57 (-128.67)        | -                         | -126.55                  | -                         |
| C <sub>5</sub> '-C <sub>6</sub> '-C <sub>8</sub> '-C <sub>9</sub> '                 | 161.31 (161.46)          | -                         | 161.20                   | -                         |

[a] The geometric parameters of the ground state ( $S_0$ ). [b] The geometric parameters of the first excited state ( $S_1$ )

**Table S3:** Calculated important bond lengths (in Å) and bond angles (in degree) for the fully optimized structure of NaUP-dimer (in DCM) and NaUP-DMSO complex (in DMSO) in ground state ( $S_0$ ) and first excited state ( $S_1$ ).

|                                                                                     | NaUP(DCM) <sup>[a]</sup> | NaUP(DMSO) <sup>[a]</sup> | NaUP(DCM) <sup>[b]</sup> | NaUP(DMSO) <sup>[b]</sup> |
|-------------------------------------------------------------------------------------|--------------------------|---------------------------|--------------------------|---------------------------|
| N <sub>1</sub> -H <sub>1</sub>                                                      | 1.04                     | 1.03                      | 1.04                     | 1.03                      |
| N <sub>2</sub> -H <sub>2</sub>                                                      | 1.04                     | 1.04                      | 1.04                     | 1.04                      |
| N <sub>1</sub> '-H <sub>1</sub> '                                                   | 1.04                     | -                         | 1.04                     | -                         |
| N <sub>2</sub> '-H <sub>2</sub> '                                                   | 1.04                     | -                         | 1.04                     | -                         |
| N <sub>4</sub> -H <sub>3</sub>                                                      | 1.03                     | 1.03                      | 1.03                     | 1.03                      |
| N <sub>4</sub> '-H <sub>3</sub> '                                                   | 1.03                     | -                         | 1.03                     | -                         |
| O <sub>1</sub> '...H <sub>1</sub>                                                   | 1.72                     | 1.97                      | 1.72                     | 1.98                      |
| N <sub>3</sub> '...H <sub>2</sub>                                                   | 1.92                     | -                         | 1.91                     | -                         |
| N <sub>3</sub> '...H <sub>2</sub> '                                                 | 1.92                     | -                         | 1.92                     | -                         |
| O <sub>1</sub> '...H <sub>1</sub> '/H <sub>2</sub>                                  | 1.72                     | 1.69                      | 1.71                     | 1.69                      |
| O <sub>2</sub> '...H <sub>3</sub>                                                   | 1.72                     | 1.83                      | 1.73                     | 1.83                      |
| O <sub>2</sub> '...H <sub>3</sub> '                                                 | 1.72                     | -                         | 1.72                     | -                         |
| O <sub>1</sub> '...H <sub>1</sub> -N <sub>1</sub>                                   | 173.12                   | 141.38                    | 173.05                   | 141.47                    |
| N <sub>3</sub> '...H <sub>2</sub> -N <sub>2</sub>                                   | 179.26                   | -                         | 179.76                   | -                         |
| N <sub>3</sub> '...H <sub>2</sub> '-N <sub>2</sub> '                                | 179.80                   | -                         | 179.61                   | -                         |
| O <sub>1</sub> '...H <sub>1</sub> '/H <sub>2</sub> -N <sub>1</sub> '/N <sub>2</sub> | 173.20                   | 171.27                    | 173.15                   | 171.29                    |
| O <sub>2</sub> '...H <sub>3</sub> -N <sub>4</sub>                                   | 136.56                   | 132.71                    | 136.45                   | 132.71                    |
| O <sub>2</sub> '...H <sub>3</sub> '-N <sub>4</sub> '                                | 136.61                   | -                         | 136.64                   | -                         |
| C <sub>1</sub> -N <sub>1</sub> -C <sub>2</sub> -N <sub>2</sub>                      | 179.70                   | -179.09                   | -179.19                  | -178.96                   |
| O <sub>2</sub> -C <sub>2</sub> -N <sub>2</sub> -C <sub>3</sub>                      | 0.34                     | -8.83                     | 0.75                     | -8.55                     |
| H <sub>3</sub> -N <sub>4</sub> -C <sub>4</sub> -C <sub>6</sub>                      | -179.52                  | -179.94                   | -179.15                  | 179.95                    |
| C <sub>5</sub> -C <sub>6</sub> -C <sub>7</sub> -C <sub>8</sub>                      | <b>-90.53</b>            | -83.61                    | <b>-102.74</b>           | -86.10                    |
| C <sub>5</sub> -C <sub>6</sub> -C <sub>8</sub> -C <sub>9</sub>                      | <b>100.54</b>            | -115.40                   | <b>121.76</b>            | -118.59                   |
| C <sub>1</sub> '-N <sub>1</sub> '-C <sub>2</sub> '-N <sub>2</sub> '                 | -179.62                  | -                         | -179.70                  | -                         |
| O <sub>2</sub> '-C <sub>2</sub> '-N <sub>2</sub> '-C <sub>3</sub> '                 | 0.50                     | -                         | 1.16                     | -                         |
| H <sub>3</sub> '-N <sub>4</sub> '-C <sub>4</sub> '-C <sub>6</sub> '                 | 179.59                   | -                         | -179.84                  | -                         |
| C <sub>5</sub> '-C <sub>6</sub> '-C <sub>7</sub> '-C <sub>8</sub> '                 | <b>89.86</b>             | -                         | <b>78.69</b>             | -                         |
| C <sub>5</sub> '-C <sub>6</sub> '-C <sub>8</sub> '-C <sub>9</sub> '                 | <b>-99.24</b>            | -                         | <b>-17.69</b>            | -                         |

[a] The geometric parameters of the ground state ( $S_0$ ). [b] The geometric parameters of the first excited state ( $S_1$ )

**Table S4:** Calculated important bond lengths (in Å) and bond angles (in degree) for the fully optimized structure of UPNa-dimer (in DCM) and UPNa-DMSO complex (in DMSO) in ground state ( $S_0$ ) and first excited state ( $S_1$ ).

|                                                                                    | UPNa (DCM) <sup>[a]</sup> | UPNa (DMSO) <sup>[a]</sup> | UPNa (DCM) <sup>[b]</sup> | UPNa (DMSO) <sup>[b]</sup> |
|------------------------------------------------------------------------------------|---------------------------|----------------------------|---------------------------|----------------------------|
| N <sub>1</sub> -H <sub>1</sub>                                                     | 1.04                      | 1.04                       | 1.05                      | 1.05                       |
| N <sub>2</sub> -H <sub>2</sub>                                                     | 1.04                      | 1.05                       | 1.04                      | 1.05                       |
| N <sub>1</sub> '-H <sub>1</sub> '                                                  | 1.04                      | -                          | 1.04                      | -                          |
| N <sub>2</sub> '-H <sub>2</sub> '                                                  | 1.04                      | -                          | 1.04                      | -                          |
| N <sub>4</sub> -H <sub>3</sub>                                                     | 1.03                      | 1.03                       | 1.03                      | 1.02                       |
| N <sub>4</sub> '-H <sub>3</sub> '                                                  | 1.03                      | -                          | 1.03                      | -                          |
| O <sub>1</sub> '...H <sub>1</sub>                                                  | <b>1.70</b>               | <b>1.75</b>                | <b>1.66</b>               | <b>1.68</b>                |
| N <sub>3</sub> '...H <sub>2</sub>                                                  | <b>1.92</b>               | -                          | <b>1.89</b>               | -                          |
| N <sub>3</sub> ...H <sub>2</sub> '                                                 | <b>1.92</b>               | -                          | <b>1.90</b>               | -                          |
| O <sub>1</sub> ...H <sub>1</sub> '/H <sub>2</sub>                                  | 1.70                      | <b>1.71</b>                | 1.70                      | <b>1.68</b>                |
| O <sub>2</sub> ...H <sub>3</sub>                                                   | <b>1.74</b>               | <b>1.84</b>                | <b>1.76</b>               | <b>1.86</b>                |
| O <sub>2</sub> '...H <sub>3</sub> '                                                | <b>1.74</b>               | -                          | <b>1.75</b>               | -                          |
| O <sub>1</sub> '...H <sub>1</sub> -N <sub>1</sub>                                  | 171.54                    | 164.38                     | 171.21                    | 167.71                     |
| N <sub>3</sub> '...H <sub>2</sub> -N <sub>2</sub>                                  | 177.59                    | -                          | 178.26                    | -                          |
| N <sub>3</sub> ...H <sub>2</sub> '-N <sub>2</sub> '                                | 177.59                    | -                          | 177.60                    | -                          |
| O <sub>1</sub> ...H <sub>1</sub> '/H <sub>2</sub> -N <sub>1</sub> '/N <sub>2</sub> | 171.54                    | 172.10                     | 172.12                    | 171.63                     |
| O <sub>2</sub> ...H <sub>3</sub> -N <sub>4</sub>                                   | 135.05                    | 131.90                     | 134.10                    | 131.05                     |
| O <sub>2</sub> '...H <sub>3</sub> '-N <sub>4</sub> '                               | 135.05                    | -                          | 134.72                    | -                          |
| N <sub>2</sub> -C <sub>1</sub> -N <sub>1</sub> -C <sub>2</sub>                     | -178.32                   | -172.62                    | -173.29                   | -168.38                    |
| N <sub>2</sub> -C <sub>1</sub> -C <sub>2</sub> -C <sub>3</sub>                     | <b>-178.03</b>            | <b>40.19</b>               | <b>-164.44</b>            | <b>26.04</b>               |
| N <sub>2</sub> '-C <sub>1</sub> '-N <sub>1</sub> '-C <sub>2</sub> '                | -178.32                   | -                          | -177.75                   | -                          |
| N <sub>2</sub> '-C <sub>1</sub> '-C <sub>2</sub> '-C <sub>3</sub> '                | -178.04                   | -                          | -173.58                   | -                          |

[a] The geometric parameters of the ground state ( $S_0$ ). [b] The geometric parameters of the first excited state ( $S_1$ )

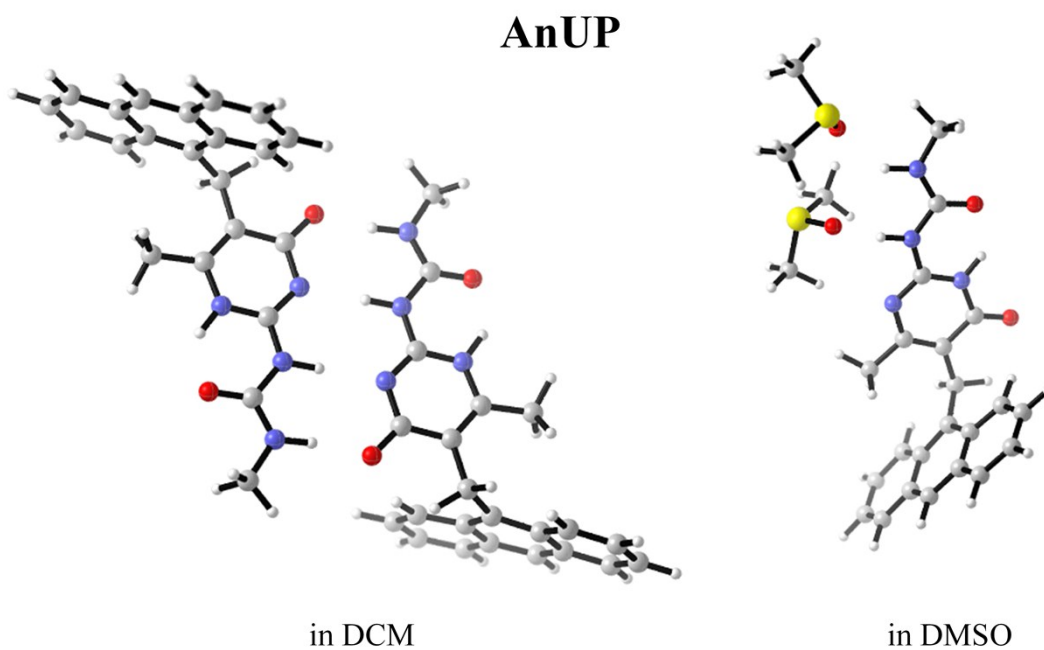

**Figure S2.** Optimized first excited state ( $S_1$ ) structures for AnUP dimer (in DCM) and monomer complexes (in DMSO). Gray: C; red: O; blue: N; yellow: S; white: H.

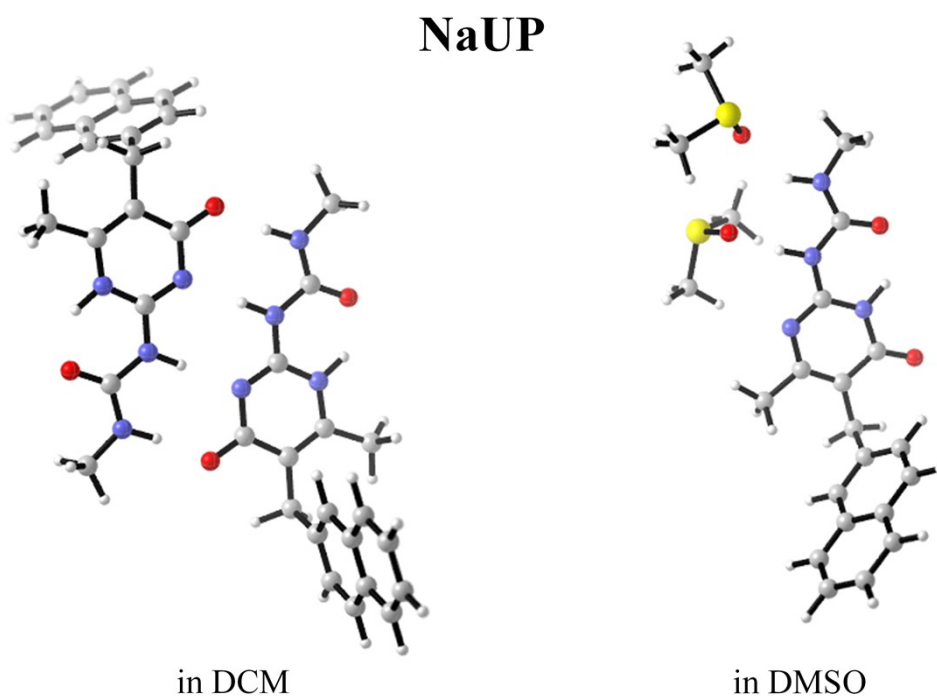

**Figure S3.** Optimized first excited state ( $S_1$ ) structures for NaUP dimer (in DCM) and monomer complexes (in DMSO). Gray: C; red: O; blue: N; yellow: S; white: H.

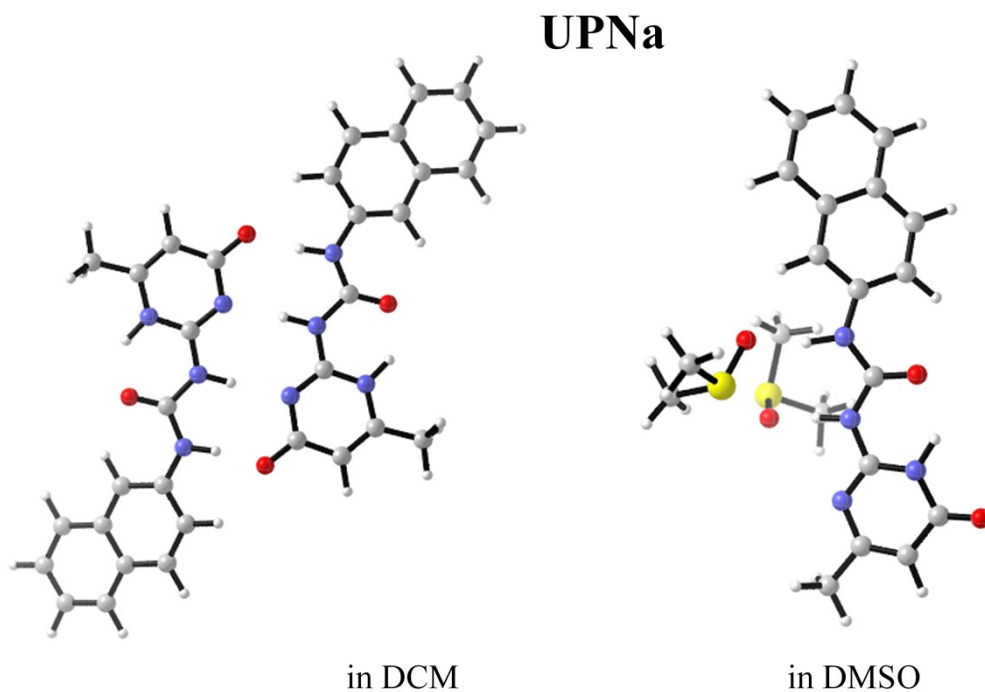

**Figure S4.** Optimized first excited state ( $S_1$ ) structures for UPNa dimer (in DCM) and monomer complexes (in DMSO). Gray: C; red: O; blue: N; yellow: S; white: H.

YZL150331--ANUP

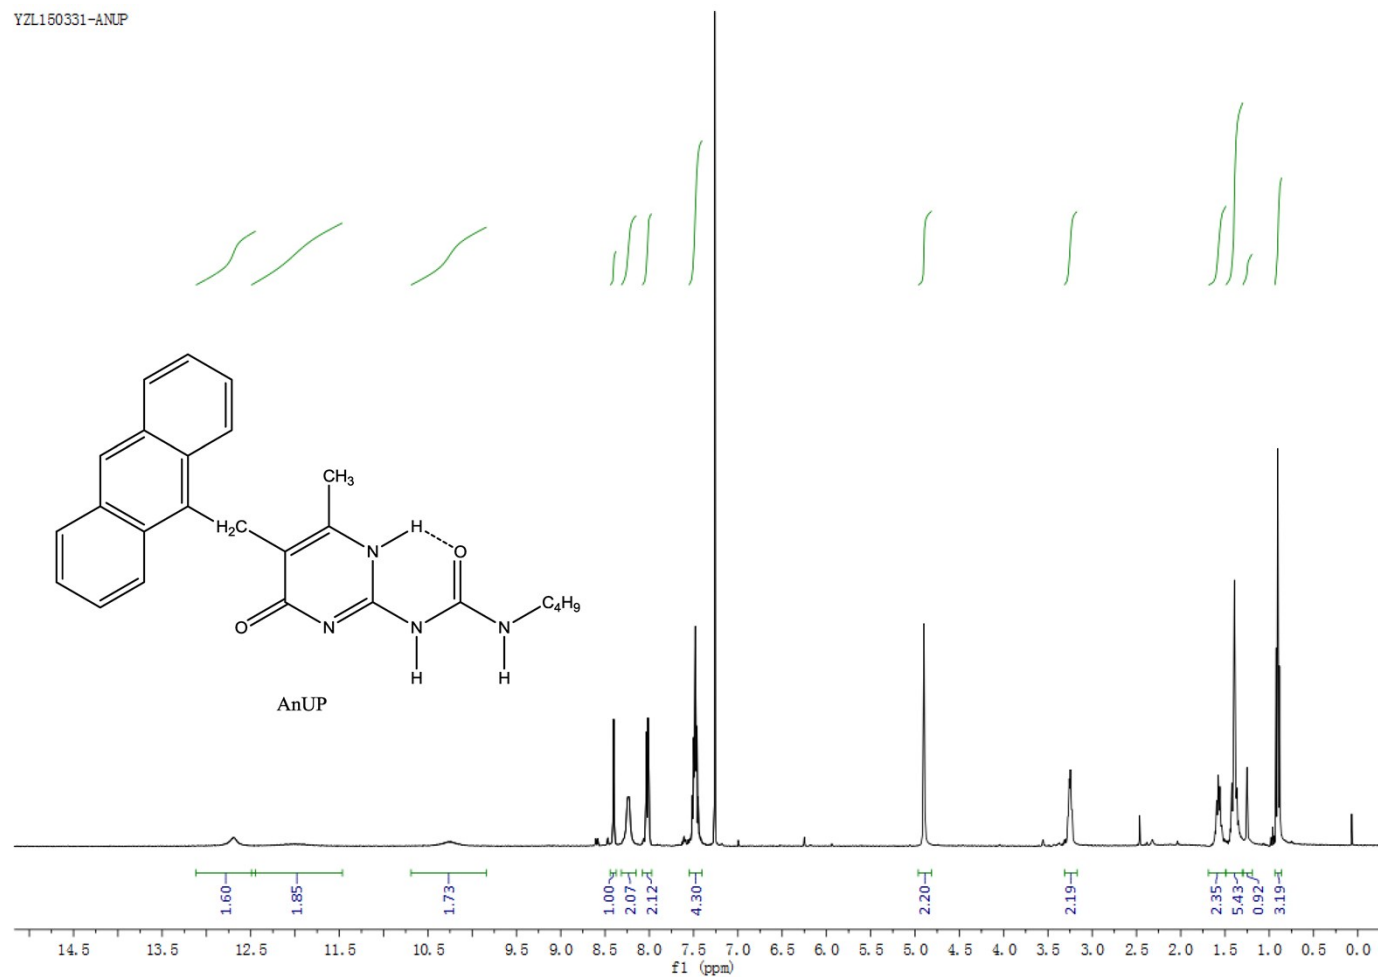

**Figure S6.** <sup>1</sup>H NMR spectrum of AnUP in CDCl<sub>3</sub>



YZL160331-NaUP

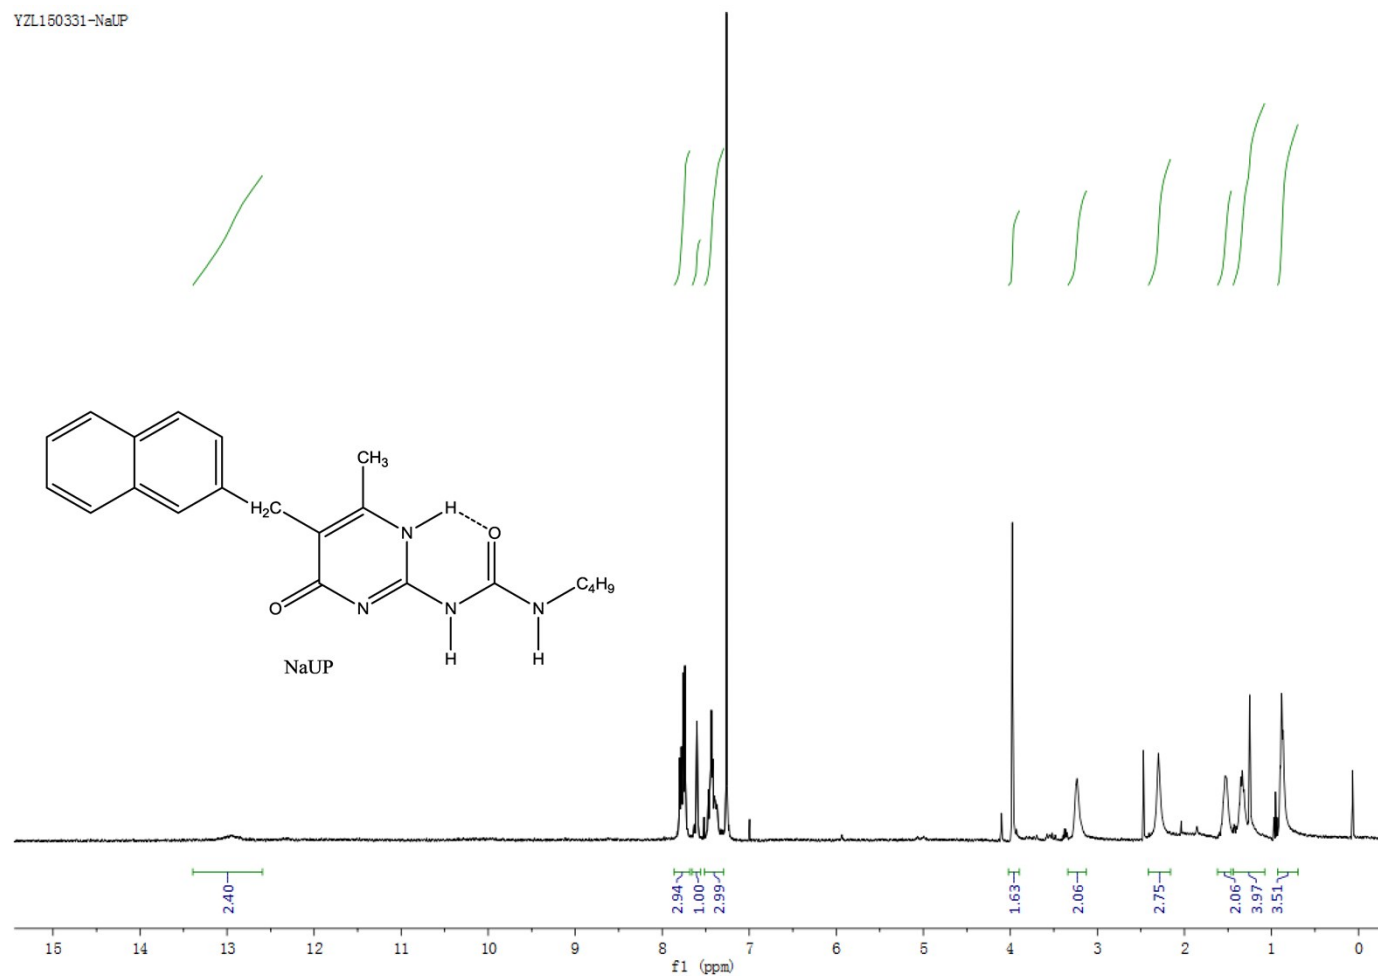

Figure S7. <sup>1</sup>H NMR spectrum of NaUP in CDCl<sub>3</sub>

YZL150331-UPNa

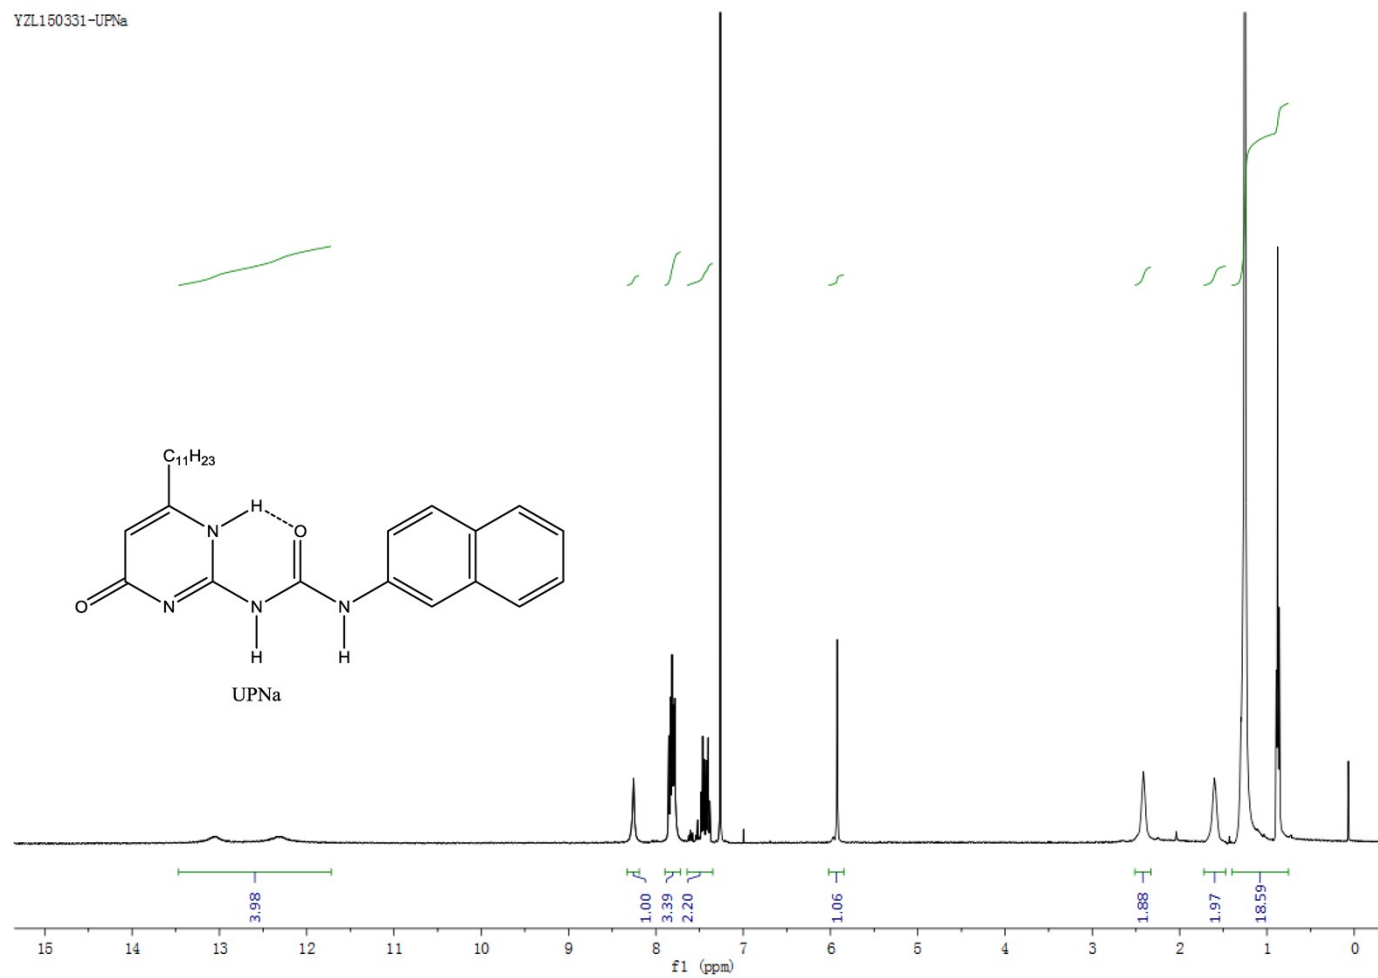

**Figure S8.** <sup>1</sup>H NMR spectrum of UPNa in CDCl<sub>3</sub>

$^1\text{H}$  NMR spectra were recorded on a Bruker Avance II 400 MHz NMR spectrometers using  $\text{CDCl}_3$  as solvent. Chemical shifts ( $\delta$ ) are reported to the shift-scale calibrated with the residual NMR solvent as internal standard.

### Reference:

1. Zhao, Y.-p.; Zhao, C.-c.; Wu, L.-z.; Zhang, L.-p.; Tung, C.-h.; Pan, Y.-j., First Fluorescent Sensor for Fluoride Based on 2-Ureido-4 [ 1H ] -pyrimidinone Quadruple Hydrogen-Bonded AADD Supramolecular Assembly. *J Org Chem* **2006**, *71*, 2143-2146.
